# Supplementary material for: A multi-generational risk assessment of Cry1F on the non-target soil organism Folsomia candida (Collembola) based on whole transcriptome profiling
Source: PeerJ. 2019 May 10;7:e6924. doi: 10.7717/peerj.6924 (PMC6512762; doi:10.7717/peerj.6924)
Supplement: Supplemental Information 1 — Raw data for the concentrations of Cry1F in the diets and in F. candida fed in groups measured by ELISA. [file peerj-07-6924-s001.xlsx]

## Sheet: Diet test1
Data S1. Raw data for the concentrations of Cry1F in the diets and in F. candida fed in groups measured by ELISA.
Calibrator and blank control
	Concentration(ppb)	OD1	OD2	OD3	OD(mean)			Weight(mg)	OD1	OD2	OD3	OD(mean)	ppb(ng/ml)	Total Bt(ng)	Bt contcentration(μg/g)
Cal1	45	0.284487	0.30133	0.309455	0.298		Yeast	1.1	0.0978913	0.101848	0.109038	0.102926	0.323671	0.323671	0.294246
Cal2	15	0.187414	0.189687	0.189741	0.189		Yeast+Bt(fresh)*	2.1	0.574693	0.484872	0.529422	0.529662	839.978	839.978	399.99
Cal3	5	0.13233	0.124934	0.128568	0.129		Yeast+Bt(2 days)	3.1	0.461011	0.560139	0.476272	0.499141	780.108	780.108	251.648
BL	0	0.086548	0.086708	0.09096	0.088
							*All samples were add 1ml extraction buffer, independently. Yeast+Bt samples were 9 times diluted for test.

## Sheet: Diet test2
Calibrator and blank control
	Concentration(ppb)	OD1	OD2	OD3	OD(mean)			Weight(mg)	OD1	OD2	OD3	OD(mean)	ppb(ng/ml)	Total Bt(ng)	Bt contcentration(μg/g)
Cal1	45	2.21579	2.12491	2.3436	2.2281		Yeast	0.8	0.402139	0.348373	0.337264	0.362592	-1.8714	-1.30998	-1.63747
Cal2	15	1.08614	1.08124	1.12918	1.09885		Yeast+Bt(fresh)*	1.9	5.25815	5.25807	4.95155	5.15592	1167.83	817.479	430.252
Cal3	5	0.702743	0.651327	0.685312	0.679794		Yeast+Bt(2 days)	1.6	4.76337	4.31638	4.56821	4.54932	1017.67	712.368	445.23
BL	0	0.36774	0.357114	0.390857	0.371904
							*All samples were add 700μl extraction buffer, independently. Yeast+Bt samples were 10 times diluted for test.

## Sheet: Diet test3
Calibrator and blank control
	Concentration(ppb)	OD1	OD2	OD3	OD(mean)				Weight(mg)	OD1	OD2	OD3	OD(mean)	ppb(ng/ml)	Total Bt(ng)	Bt contcentration(μg/g)
Cal1	45	1.77347	1.43017	1.89196	1.69853			Yeast+Bt(2 days)*	6	1.37438	1.24194	1.36265	1.32632	3226.32	2258.42	376.404
Cal2	15	0.91404	0.723432	0.909781	0.849084
Cal3	5	0.464306	0.435006	0.538097	0.479136
BL	0	0.29824	0.264124	0.308161	0.290175			*Diet sample was add 700μl extraction buffer and 100 times diluted for test.

## Sheet: 1st generation
Calibrator and blank control
	Concentration(ppb)	OD1	OD2	OD3	OD(mean)				Weight(mg)	OD1	OD2	OD3	OD(mean)	ppb(ng/ml)	Total Bt(ng)	Bt contcentration(μg/g)
Cal	50.9042	2.70195	2.67328	2.6746	2.68328			CT1*	1.5	0.114717	0.117432	0.109888	0.114012	-1.05135	-0.735945	-0.49063
Cal1	25.4521	1.41013	1.41528	1.42612	1.41718			CT2	1.8	0.118254	0.1153	0.108055	0.11387	-1.05424	-0.737967	-0.409982
Cal2	12.7261	0.787216	0.809681	0.788279	0.795059			CT3	1.4	0.0957155	0.0956365	0.0925578	0.0946366	-1.44371	-1.0106	-0.721854
Cal3	6.36303	0.492731	0.456477	0.45868	0.469296			BT1	2.7	0.389323	0.413987	0.41382	0.40571	9.71105	6.79774	2.51768
Cal4	3.18152	0.351051	0.316047	0.318005	0.328368			BT2	2.8	0.35266	0.358218	0.353794	0.354891	7.65287	5.35701	1.91322
Cal5	1.59076	0.262426	0.236371	0.238985	0.245927			BT3	1.9	0.53695	0.55528	0.625103	0.572444	16.4638	11.5247	6.06561
Cal6	0.795379	0.229074	0.200945	0.195805	0.208608
BL	0	0.184015	0.159486	0.160912	0.168138
								*All samples were add 700μl extraction buffer, independently. BT samples were 2 times diluted for test.

## Sheet: 2nd generation(CT)
Calibrator and blank control
	Concentration(ppb)	OD1	OD2	OD3	OD（mean）			Weight(mg)	OD1	OD2	OD3	OD(mean)	ppb(ng/ml)	Total Bt(ng)	Bt contcentration(μg/g)
Cal1	45	2.21579	2.12491	2.3436	2.2281		CT1*	2.4	0.38263	0.421788	0.398031	0.400816	-0.925192	-0.647635	-0.269848
Cal2	15	1.08614	1.08124	1.12918	1.09885		CT2	2.1	0.363683	0.368837	0.388077	0.373532	-1.60058	-1.12041	-0.533527
Cal3	5	0.702743	0.651327	0.685312	0.679794
BL	0	0.36774	0.357114	0.390857	0.371904
							*All samples were add 700μl extraction buffer, independently.

## Sheet: 2nd generation(BT)
Calibrator and blank control
	Concentration(ppb)	OD1	OD2	OD3	OD(mean)				Weight(mg)	OD1	OD2	OD3	OD(mean)	ppb(ng/ml)	Total Bt(ng)	Bt contcentration(μg/g)
Cal1	45	1.77347	1.43017	1.89196	1.69853			BT1*	4.3	0.468805	0.444483	0.424955	0.446081	7.81411	5.46987	1.27206
Cal2	15	0.91404	0.723432	0.909781	0.849084			BT2	4.4	0.702533	0.7555	0.736882	0.731638	26.212	18.3484	4.17009
Cal3	5	0.464306	0.435006	0.538097	0.479136
BL	0	0.29824	0.264124	0.308161	0.290175
								*All samples were add 700μl extraction buffer, independently. BT samples were 2 times diluted for test.

## Sheet: 3rd generation
Calibrator and blank control
	Concentration(ppb)	OD1	OD2	OD3	OD(mean)				Weight(mg)	OD1	OD2	OD3	OD(mean)	ppb(ng/ml)	Total Bt(ng)	Bt contcentration(μg/g)
Cal1	46.7938	2.15057	2.17574	2.19313	2.17315			CT1*	2.9	0.171343	0.165672	0.160164	0.165726	-0.831001	-0.581701	-0.200586
Cal2	23.3969	1.23604	1.16178	1.19315	1.19699			CT2	2.4	0.141093	0.146147	0.138781	0.142007	-1.39184	-0.974291	-0.405955
Cal3	11.6984	0.737703	0.693805	0.693263	0.708257			CT3	2.6	0.135291	0.32689	0.140425	0.200869	-6.03767e-05	-4.22637e-05	-1.62553e-05
Cal4	5.84922	0.4644	0.448474	0.446472	0.453115			BT1	4.4	1.00408	1.05708	1.09617	1.05244	40.2708	28.1896	6.40673
Cal5	2.92461	0.326244	0.309532	0.315129	0.316968			BT2	5	1.06827	1.14152	1.1459	1.11856	43.3977	30.3784	6.07567
Cal6	1.46231	0.262536	0.270016	0.251124	0.261225			BT3	4	0.582889	0.569834	0.586973	0.579899	17.9242	12.5469	3.13674
BL	0	0.199249	0.197411	0.181151	0.192604
								*All samples were add 700μl extraction buffer, independently. BT samples were 2 times diluted for test.
